# Supplementary material
Source: PubMed Central journal article supplement (PMC4111736)
Supplement: rna-10-968-s01.pdf [file rna-10-968-s01.pdf]

## **Supplemental Material to:**

**Denisa D. Mateus, João A. Paredes, Yaiza Español,  
Lluís Ribus de Pouplana, Gabriela R. Moura  
and Manuel A.S. Santos**

**Molecular reconstruction of a  
fungal genetic code alteration**

**2013; 10(6)**

**<http://dx.doi.org/10.4161/rna.24683>**

**[www.landesbioscience.com/journals/rnabiology/article/24683/](http://www.landesbioscience.com/journals/rnabiology/article/24683/)**

## Supplementary Material

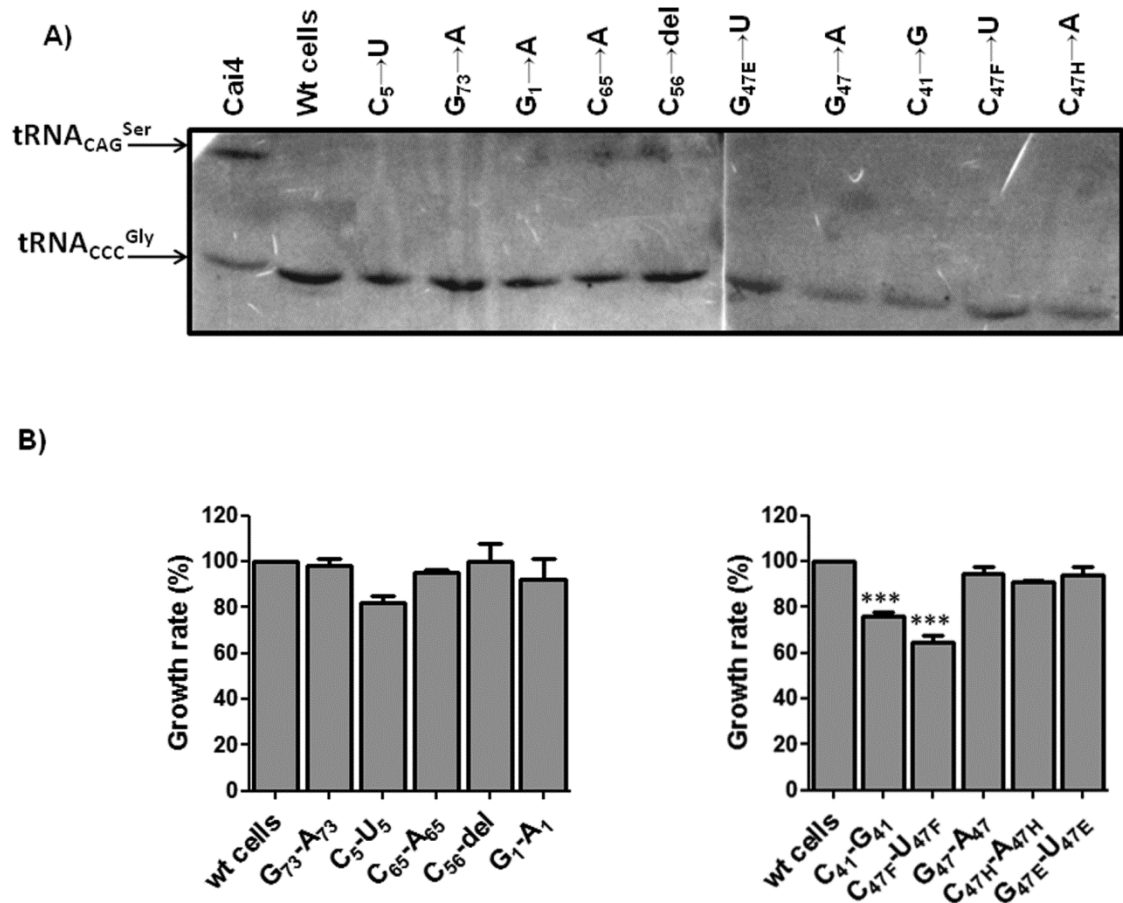

**Figure S1: Mutations identified by forced evolution studies inactivate the *C. albicans* tRNA<sub>CAG</sub><sup>Ser</sup>.** (A) Northern blot analysis of mutant *C. albicans* tRNA<sub>CAG</sub><sup>Ser</sup> expressed in yeast haploid cells. 50 µg of tRNAs extracted from viable haploid spores were purified under acidic conditions and fractionated on 12% polyacrylamide gels containing 8M urea at room temperature. Detection of tRNA<sub>CAG</sub><sup>Ser</sup> and tRNA<sub>CCC</sub><sup>Gly</sup> was carried out using  $\gamma$ -<sup>32</sup>P-ATP-tRNA<sub>CAG</sub><sup>Ser</sup> and  $\gamma$ -<sup>32</sup>P-ATP-tRNA<sub>CCC</sub><sup>Gly</sup> probes. Cai4 corresponds to *C. albicans* total tRNA extract and WT corresponds to tRNAs extracted from yeast cells containing KanMx4 cassette only. Membranes were exposed for 24 hours to a K-screen and were visualized using Bio-Rad Molecular Imager FX. (B)

Mutations in the *C. albicans* tDNA<sub>CAG</sub><sup>Ser</sup> gene restored yeast growth. Yeast cultures were inoculated at an initial OD<sub>600</sub> of 0.02 and were grown at 30°C, 180 rpm in YPD+geneticin until late stationary phase. WT corresponds to cells containing the KanMX4 cassette only. The relative growth rate of cells transformed with mutant tRNA<sub>CAG</sub><sup>Ser</sup> was determined using exponential growth phase values, relative to the control cells (WT). Data represent the mean ± s.e.m. of 3-5 independent experiments. (\*\*\*)p < 0.001 one-way Anova post Bonferroni's multiple comparison test with CI of 95%, relative to the WT control cells).

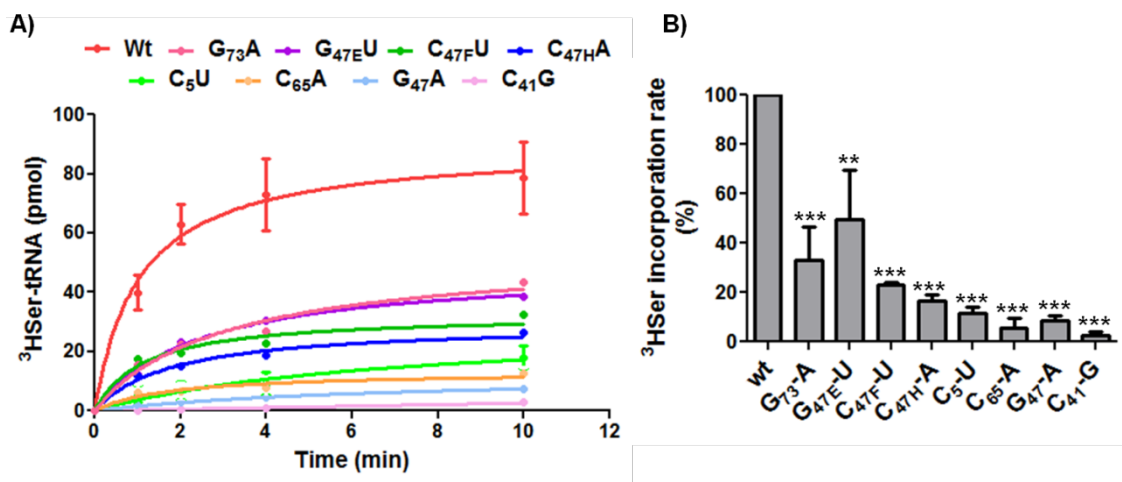

**Figure S2:** Serylation of *C. albicans* WT and mutant tRNA<sub>CAG</sub><sup>Ser</sup> with *C. albicans* SerRS. *In vitro* aminoacylation assays were carried out with *in vitro* synthesized wild-type and mutant tRNA<sub>CAG</sub><sup>Ser</sup>. Aminoacylation reactions were carried out using purified *C. albicans* SerRS overexpressed in *E. coli*. Data represent the mean ± SD of 3 independent experiments (\*\*p < 0.01, \*\*\*p < 0.001 one-way Anova post Bonferroni's multiple comparison test with CI 95%, relatively to WT tRNA).

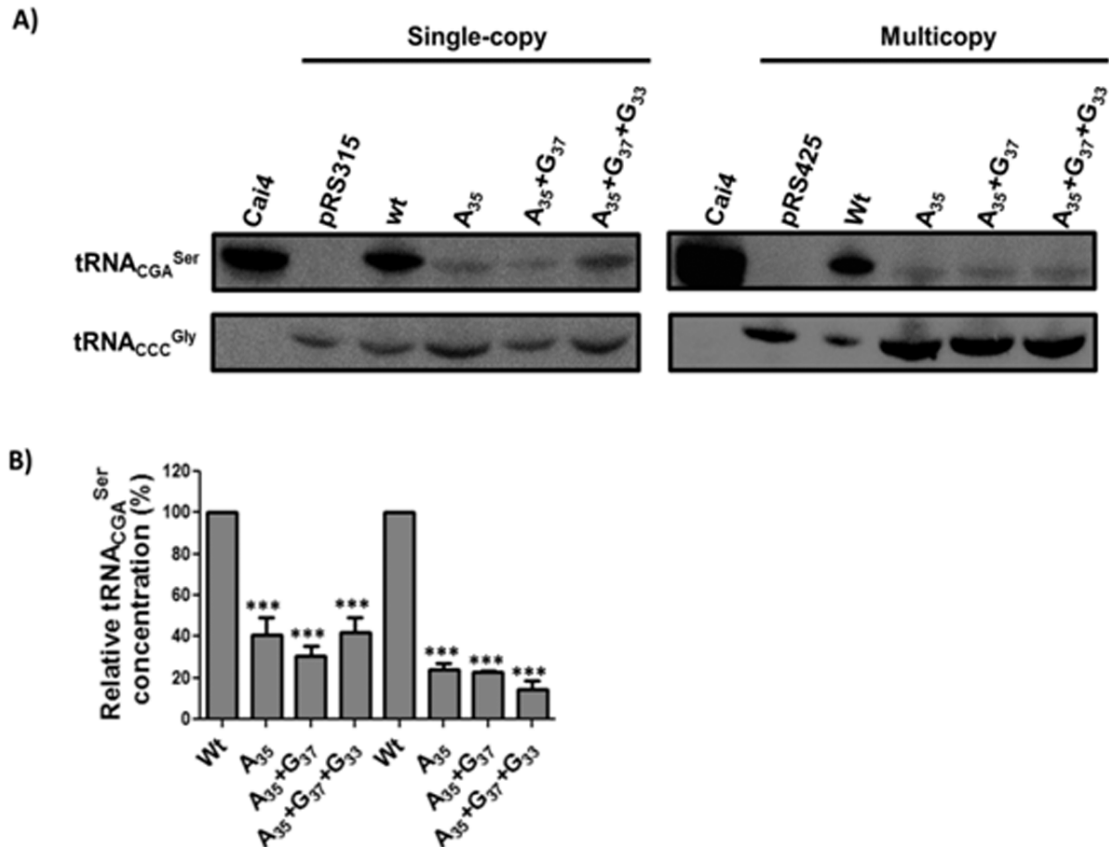

**Figure S3: Expression of mutants tRNA<sub>CGA</sub><sup>Ser</sup> from multicopy plasmids do not restore tRNAs level in yeast cells.** (A) Northern blot analysis of mutant *C. albicans* tRNA<sub>CGA</sub><sup>Ser</sup> expressed in from single copy and multicopy plasmids in diploid yeast cells. 50  $\mu$ g of total tRNA extracted and purified under acidic conditions were fractionated on 15% polyacrylamide gels containing 8M urea at room temperature. Detection of tRNA<sub>CGA</sub><sup>Ser</sup> and tRNA<sub>CCC</sub><sup>Gly</sup> was carried out with  $\gamma$ -<sup>32</sup>P-ATP-tRNA<sub>CGA</sub><sup>Ser</sup> and  $\gamma$ -<sup>32</sup>P-ATP-tRNA<sub>CCC</sub><sup>Gly</sup> probes. Membranes were exposed for 24 hours to a K-screen and were visualized using Bio-Rad Molecular Imager FX. (B) Quantification of mutant tRNAs expression from single copy and multicopy plasmids relative to the WT tRNA expression (WT tRNA<sub>CGA</sub><sup>Ser</sup> expressed from single copy or multicopy plasmids). Data represent the mean  $\pm$  s.e.m. of 3 independent experiments (\*\*\*) $p < 0.001$ , one-way Anova post Bonferroni's test with CI 95% relative to WT tRNA<sub>CGA</sub><sup>Ser</sup>).

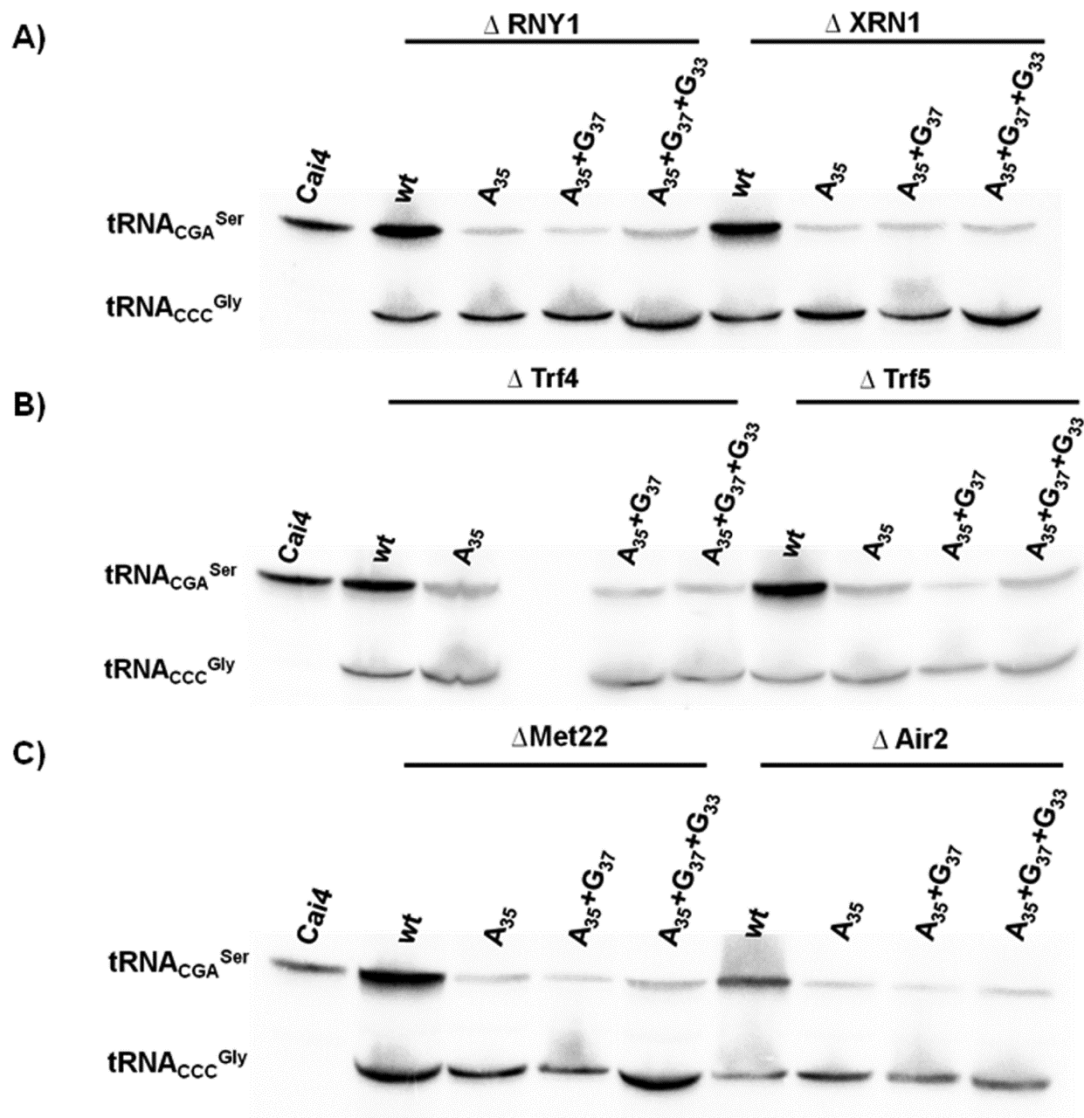

**Figure S4: Down regulation of the mutant  $tRNA_{CGA}^{Ser}$  is not mediated by known tRNA degradation pathways.** In order to restore the levels of mutant tRNAs, WT and mutant  $tRNA_{CGA}^{Ser}$  were expressed in yeast strains deleted in the RNY1, XRN1, TRF4, TRF5, MET22 and AIR2 genes, respectively, which encode proteins involved in tRNA degradation. 50  $\mu$ g of total tRNA extracted and purified under acidic conditions were fractionated on 15% polyacrylamide gels containing 8M urea at room temperature. Detection of  $tRNA_{CGA}^{Ser}$  and  $tRNA_{CCC}^{Gly}$  was carried out with  $\gamma$ - $^{32}$ P-ATP- $tRNA_{CGA}^{Ser}$

and  $\gamma$  -<sup>32</sup>P-ATP-tRNA<sub>ACC</sub><sup>Gly</sup> probes. Membranes were exposed for 24 hours to a K-screen and were visualized using Bio-Rad Molecular Imager FX.

**Table S1: List of the oligonucleotides used**

| Oligo                                                                                                                                     | T <sub>m</sub> (°C) | Sequence 5'-3'                                                                    |
|-------------------------------------------------------------------------------------------------------------------------------------------|---------------------|-----------------------------------------------------------------------------------|
| <b>Integration of tRNA<sub>CGA</sub><sup>Ser</sup> in pRS315</b>                                                                          |                     |                                                                                   |
| oUA2177                                                                                                                                   | 60°C                | CGCGTCGACAAATTTGACAGTGTGGCCGAGC                                                   |
| oUA2178                                                                                                                                   | 60°C                | CGCGGATCCGTGGGAAAAAATATTCAAGAAAC                                                  |
| <b>SDM of tRNA<sub>CGA</sub><sup>Ser</sup> for A<sub>35</sub> insertion</b>                                                               |                     |                                                                                   |
| oUA2105                                                                                                                                   | 55°C                | GTTAAGGCGTCTGACTCAGAATCTTATTCGCG                                                  |
| oUA2106                                                                                                                                   | 55°C                | CGCGAATAAGATTCTGAGTCAGACGCCTTAAC                                                  |
| <b>SDM of tRNA<sub>CGA</sub><sup>Ser</sup> with A<sub>35</sub> inserted for A<sub>37</sub>→G<sub>37</sub> transition</b>                  |                     |                                                                                   |
| oUA2107                                                                                                                                   | 55°C                | GTTAAGGCGTCTGACTCAGGATCTTATTCGCGTTATCAG                                           |
| oUA2108                                                                                                                                   | 55°C                | CTGATAACGCGAATAAGATCCTGAGTCAGACGCCTTAAC                                           |
| <b>SDM of tRNA<sub>CGA</sub><sup>Ser</sup> with A<sub>35</sub>+G<sub>37</sub> inserted for U<sub>33</sub>→G<sub>33</sub> transversion</b> |                     |                                                                                   |
| oUA2109                                                                                                                                   | 55°C                | GTTAAGGCGTCTGACGCAGGATCTTATTCGCGTTATCAG                                           |
| oUA2110                                                                                                                                   | 55°C                | CTGATAACGCGAATAAGA TCCTGCGTCAGACGCCTTAAC                                          |
| <b>KanMX4-tRNA<sub>CAG</sub><sup>Ser</sup> integration in the Leu2 locus</b>                                                              |                     |                                                                                   |
| oUA243                                                                                                                                    | 59°C                | CTTGACCGCAGTTAACTGTGGGAATACTCAGGTATCGTAAG<br>ATGCAAGAGTTCGCCGGGTTAATTAAGGCGCGC    |
| oUA244                                                                                                                                    | 59°C                | GGGGCAGACATTAGAATGGTATATCCTTGAAATATATATAT<br>ATATATTGCTGTAGTTGAAACACCAAACAAAAGATG |
| <b>tRNA<sub>CAG</sub><sup>Ser</sup> integration confirmation</b>                                                                          |                     |                                                                                   |
| oUA219                                                                                                                                    | 47°C                | CTCAATCTCGAGCCCACAGATGATTGAC                                                      |
| oUA222                                                                                                                                    | 47°C                | AATTTACCGCGGACTAGTTGAAACACC                                                       |
| <b>KanMx4 integration in the Leu2 locus</b>                                                                                               |                     |                                                                                   |
| oUA611                                                                                                                                    | 59°C                | GGGGCAGACATTAGAATGGTATATCCTTGAAATATATATAT<br>ATATATTGCTGGCATGTAATAAAGTCAATCATCTG  |
| oUA243                                                                                                                                    | 59°C                | CTTGACCGCAGTTAACTGTGGGAATACTCAGGTATCGTAAG<br>ATGCAAGAGTTCGCCGGGTTAATTAAGGCGCGC    |
| <b>KanMX4 integration confirmation</b>                                                                                                    |                     |                                                                                   |
| oUA622                                                                                                                                    | 59°C                | CCG GGT TAA TTA AGG CGC GC                                                        |
| oUA623                                                                                                                                    | 59°C                | GCA TGT AAT AAA GTC AAT CAT CTG                                                   |

|                                                                                                                                                           |      |                                         |
|-----------------------------------------------------------------------------------------------------------------------------------------------------------|------|-----------------------------------------|
| <b>Cloning of tRNA<sub>CGA</sub><sup>Ser</sup> in pUC19 plasmid</b>                                                                                       |      |                                         |
| oUA2165                                                                                                                                                   |      | AGCTTAATACGACTCACTATAGACAGTGTGGCCGAG-   |
| oUA2166                                                                                                                                                   |      | CGGTAAAGGCGTCTGACTCGAAATCAGTTGGGCTTTG   |
| oUA2167                                                                                                                                                   |      | CCCGCGCA GGTTCGAATCCTGCTGCTGTCGCCAGGG   |
| oUA2168                                                                                                                                                   |      | TTAACCGCTCGGCCACACTGTCTATAGTGAGTCGTATTA |
| oUA2169                                                                                                                                                   |      | GCGCGGGCAAAGCCCAACTGATTTCGAGTCAGACGCC   |
| oUA2170                                                                                                                                                   |      | GATCCCCTGGCGACAGCAGCAGGATTCGAACCT       |
| <b>SDM of tRNA<sub>CGA</sub><sup>Ser</sup> gene cloned in pUC19 for A<sub>35</sub> insertion</b>                                                          |      |                                         |
| oUA2171                                                                                                                                                   | 55°C | CGGTAAAGGCGTCTGACTCAGAATCAGTTGGGCTTTG   |
| oUA2172                                                                                                                                                   | 55°C | CAAAGCCCAACTGATTCTGAGTCAGACGCCTTAACCG   |
| <b>SDM of tRNA<sub>CGA</sub><sup>Ser</sup> with A<sub>35</sub> inserted cloned in pUC19 plasmid for A<sub>37</sub>→G<sub>37</sub> transition</b>          |      |                                         |
| oUA2173                                                                                                                                                   | 55°C | CGGTAAAGGCGTCTGACTCAGGATCAGTTGGGCTTTG   |
| oUA2174                                                                                                                                                   | 55°C | CAAAGCCCAACTGATCCTGAGTCAGACGCCTTAACCG   |
| <b>SDM of tRNA<sub>CGA</sub><sup>Ser</sup> with A<sub>35</sub>+G<sub>37</sub> inserted cloned in pUC19 for U<sub>33</sub>→G<sub>33</sub> transversion</b> |      |                                         |
| oUA2175                                                                                                                                                   | 55°C | CGGTAAAGGCGTCTGACGCAGGATCAGTTGGGCTTTG   |
| oUA2176                                                                                                                                                   | 55°C | CAAAGCCCAACTGATCCTGCGTCAGACGCCTTAACCG   |
| <b>SDM of pUK1302 for C<sub>41</sub>→G<sub>41</sub> transition</b>                                                                                        |      |                                         |
| oUA2185                                                                                                                                                   | 55°C | GAAGGATTCAGGTTTCGTTTGGGCATTGCC          |
| oUA2186                                                                                                                                                   | 55°C | GGCAATGCCCAAACGAACCTGAATCCTTC           |
| <b>SDM of pUK1302 for G<sub>47</sub>→A<sub>47</sub> transition</b>                                                                                        |      |                                         |
| oUA2115                                                                                                                                                   | 55°C | GATTCAGGTTTCCTTTGGACATTGCCCGCGCAGG      |
| oUA2116                                                                                                                                                   | 55°C | CCTGCGCGGGCAATGTCCAAAGGAACCTGAATC       |
| <b>SDM of pUK1302 for G<sub>47E</sub>→U<sub>47E</sub> transition</b>                                                                                      |      |                                         |
| oUA2187                                                                                                                                                   | 55°C | GTTCTTTGGGCATTTCCCGCGCAGGTTC            |
| oUA2188                                                                                                                                                   | 55°C | GAACCTGCGCGGGAAATGCCCAAAGGAAC           |
| <b>SDM of pUK1302 for C<sub>47F</sub>→U<sub>47F</sub> transition</b>                                                                                      |      |                                         |
| oUA2119                                                                                                                                                   | 55°C | GGTTCCTTTGGGCATTGTCCGCGCAGGTTCGAACC     |
| oUA2120                                                                                                                                                   | 55°C | GGTTCGAACCTGCGCGGACAATGCCCAAAGGAACC     |
| <b>SDM of pUK1302 for C<sub>47H</sub>→A<sub>47H</sub> transition</b>                                                                                      |      |                                         |
| oUA2121                                                                                                                                                   | 55°C | CCTTTGGGCATTGCCAGCGCAGGTTCGAACCC        |
| oUA2122                                                                                                                                                   | 55°C | GGGTTTCGAACCTGCGCTGGCAATGCCCAAAGG       |
| <b>SDM of pUK1302 for C<sub>65</sub>→U<sub>65</sub> transition</b>                                                                                        |      |                                         |
| oUA2123                                                                                                                                                   | 55°C | CGCAGGTTTCGAACCCTGATCGTGTCGCCAGGCC      |
| oUA2124                                                                                                                                                   | 55°C | GGCCTGGCGACACGATCAGGGTTTCGAACCTGCG      |
| <b>SDM of pUK1302 for G<sub>73</sub>→A<sub>73</sub> transition</b>                                                                                        |      |                                         |
| oUA2125                                                                                                                                                   | 55°C | CTGCTCGTGTCACCAGGCC                     |

|                                                                    |         |                      |
|--------------------------------------------------------------------|---------|----------------------|
| <b>oUA2126</b>                                                     | 55°C    | GGGCCTGGTGACACGAGCAG |
| <b>tRNA<sub>CCC</sub><sup>Gly</sup> detection by northern blot</b> |         |                      |
| <b>oUA2195</b>                                                     | 52-55°C | GCGGAAGCCGGAATCGAAC  |
| <b>tRNA<sub>CGA</sub><sup>Ser</sup> detection by northern blot</b> |         |                      |
| <b>oUA2194</b>                                                     | 55°C    | GCGACAGCAGCAGGATTTCG |
| <b>tRNA<sub>CAG</sub><sup>Ser</sup> detection by northern blot</b> |         |                      |
| <b>oUA2193</b>                                                     | 55°C    | GCGACACGAGCAGGGTTC   |

**Table S2: Description of the plasmids constructed**

| <b>Name</b>                                               | <b>Description</b>                                                                                                                                                                                                                                            |
|-----------------------------------------------------------|---------------------------------------------------------------------------------------------------------------------------------------------------------------------------------------------------------------------------------------------------------------|
| <b>WT</b>                                                 | pRS315 plasmid containing one copy of <i>C. albicans</i> tRNA <sub>CGA</sub> <sup>Ser</sup> cloned into BamHI and Sall restriction sites                                                                                                                      |
| <b>A<sub>35</sub></b>                                     | Plasmid containing the tRNA <sub>CGA</sub> <sup>Ser</sup> sequence with A <sub>35</sub> insertion. Obtained by SDM of the WT plasmid after A <sub>35</sub> insertion in the middle of the anticodon of tRNA <sub>CGA</sub> <sup>Ser</sup> gene.               |
| <b>A<sub>35</sub>+G<sub>37</sub></b>                      | Plasmid containing the tRNA <sub>CGA</sub> <sup>Ser</sup> sequence with A <sub>35</sub> +G <sub>37</sub> . Obtained by SDM of the A <sub>35</sub> plasmid after insertion of the A <sub>37</sub> →G <sub>37</sub> mutation.                                   |
| <b>A<sub>35</sub>+G<sub>37</sub>+G<sub>33</sub></b>       | Plasmid containing the tRNA <sub>CGA</sub> <sup>Ser</sup> sequence with A <sub>35</sub> +G <sub>37</sub> +G <sub>33</sub> . Obtained by SDM of the A <sub>35</sub> +G <sub>37</sub> plasmid after insertion of the A <sub>37</sub> →G <sub>37</sub> mutation. |
| <b>pUC19-WT</b>                                           | pUC19 containing <i>C. albicans</i> tRNA <sub>CGA</sub> <sup>Ser</sup> inserted between BamHI and HindIII for in vitro transcription of tRNA                                                                                                                  |
| <b>pUC19-A<sub>35</sub></b>                               | Variant of pUC19-WT containing the insertion of A <sub>35</sub> and replacement of A <sub>37</sub> of tRNA gene sequence, (tRNA <sub>CGA</sub> <sup>Ser</sup> with A <sub>35</sub> )                                                                          |
| <b>pUC-19-A<sub>35</sub>+G<sub>37</sub></b>               | Variant of pUC19-A <sub>35</sub> containing the mutation A <sub>37</sub> →G <sub>37</sub> in tRNA gene, (tRNA <sub>CGA</sub> <sup>Ser</sup> with A <sub>35</sub> +G <sub>37</sub> )                                                                           |
| <b>pUC19-A<sub>35</sub>+G<sub>37</sub>+G<sub>33</sub></b> | Variant of pUC19-A <sub>35</sub> +G <sub>37</sub> containing the mutation U <sub>33</sub> →G <sub>33</sub> in tRNA gene, (tRNA <sub>CGA</sub> <sup>Ser</sup> with A <sub>35</sub> +G <sub>37</sub> +G <sub>33</sub> )                                         |



|                     |                                                                                                                                                                                                          |
|---------------------|----------------------------------------------------------------------------------------------------------------------------------------------------------------------------------------------------------|
| C <sub>41</sub> →A  | Variant of pUK1302: plasmid containing the tRNA <sub>CAG</sub> <sup>Ser</sup> gene with U <sub>33</sub> for in vitro transcription, plus the mutation C <sub>41</sub> →A <sub>41</sub> in tRNA gene.     |
| C <sub>5</sub> →U   | Variant of pUK1302: plasmid containing the tRNA <sub>CAG</sub> <sup>Ser</sup> gene with U <sub>33</sub> for in vitro transcription, plus the mutation C <sub>5</sub> →U <sub>5</sub> in tRNA gene.       |
| G <sub>47</sub> →A  | Variant of pUK1302: plasmid containing the tRNA <sub>CAG</sub> <sup>Ser</sup> gene with U <sub>33</sub> for in vitro transcription, plus the mutation G <sub>47</sub> →A <sub>47</sub> in tRNA gene.     |
| G <sub>47E</sub> →U | Variant of pUK1302: plasmid containing the tRNA <sub>CAG</sub> <sup>Ser</sup> gene with U <sub>33</sub> for in vitro transcription, plus the mutation G <sub>47E</sub> →U <sub>47E</sub> in tRNA gene.   |
| C <sub>47F</sub> →U | Variant of pUK1302: plasmid containing the tRNA <sub>CAG</sub> <sup>Ser</sup> gene with U <sub>33</sub> for “in vitro” transcription, plus the mutation C <sub>47F</sub> →U <sub>47F</sub> in tRNA gene. |
| C <sub>47H</sub> →A | Variant of pUK1302: plasmid containing the tRNA <sub>CAG</sub> <sup>Ser</sup> gene with U <sub>33</sub> for in vitro transcription, plus the mutation C <sub>47H</sub> →A <sub>47H</sub> in tRNA gene.   |
| C <sub>65</sub> →A  | Variant of pUK1302: plasmid containing the tRNA <sub>CAG</sub> <sup>Ser</sup> gene with U <sub>33</sub> for in vitro transcription, plus the mutation C <sub>65</sub> →A <sub>65</sub> in tRNA gene.     |
| G <sub>73</sub> →A  | Variant of pUK1302: plasmid containing the tRNA <sub>CAG</sub> <sup>Ser</sup> gene U <sub>33</sub> for in vitro transcription, plus the mutation G <sub>73</sub> →A <sub>73</sub> in tRNA gene.          |

\* Mutant tRNA<sub>CAG</sub><sup>Ser</sup> genes for *in vitro* transcription were prepared by SDM using the plasmid pUKC1302 (tRNA<sub>CAG</sub><sup>Ser</sup>) constructed in a previous work.<sup>1</sup>

## Reference List

1. Perreau VM, Keith G, Holmes WM, Przykorska A, Santos MA, Tuite MF. The *Candida albicans* CUG-decoding ser-tRNA has an atypical anticodon stem-loop structure. *J Mol Biol* 1999; 1039-53
